# Supplementary material
Source: PubMed Central journal article supplement (PMC3436542)
Supplement: supp_M112.341297_jbc.M112.341297-1.pdf [file supp_M112.341297_jbc.M112.341297-1.pdf]

# Supplementary Figure S1

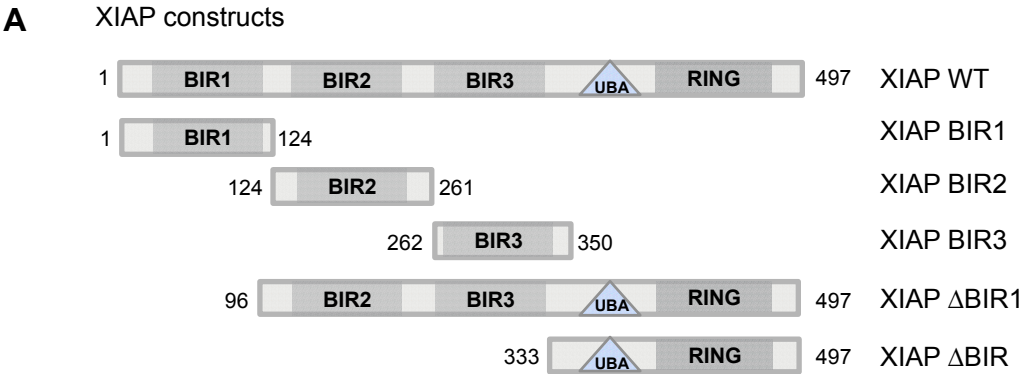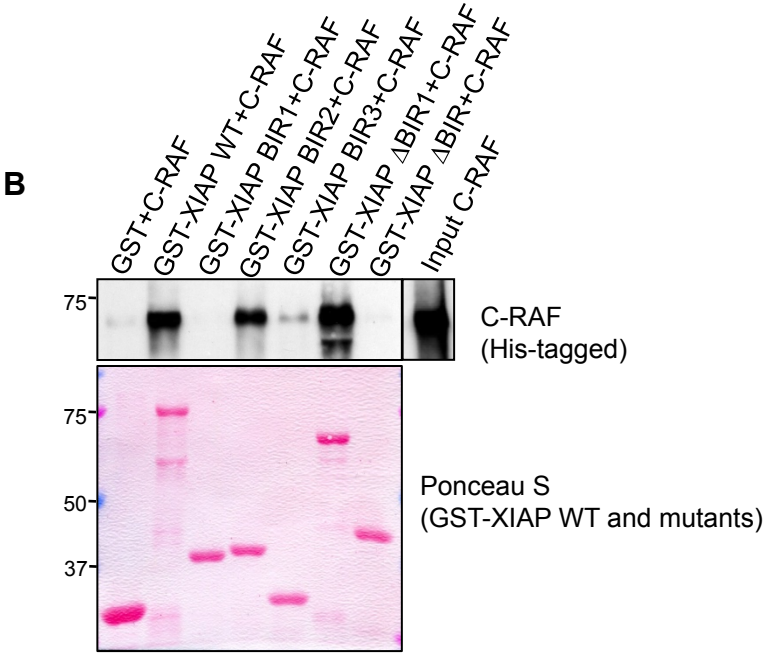

**Supplementary Figure S2**

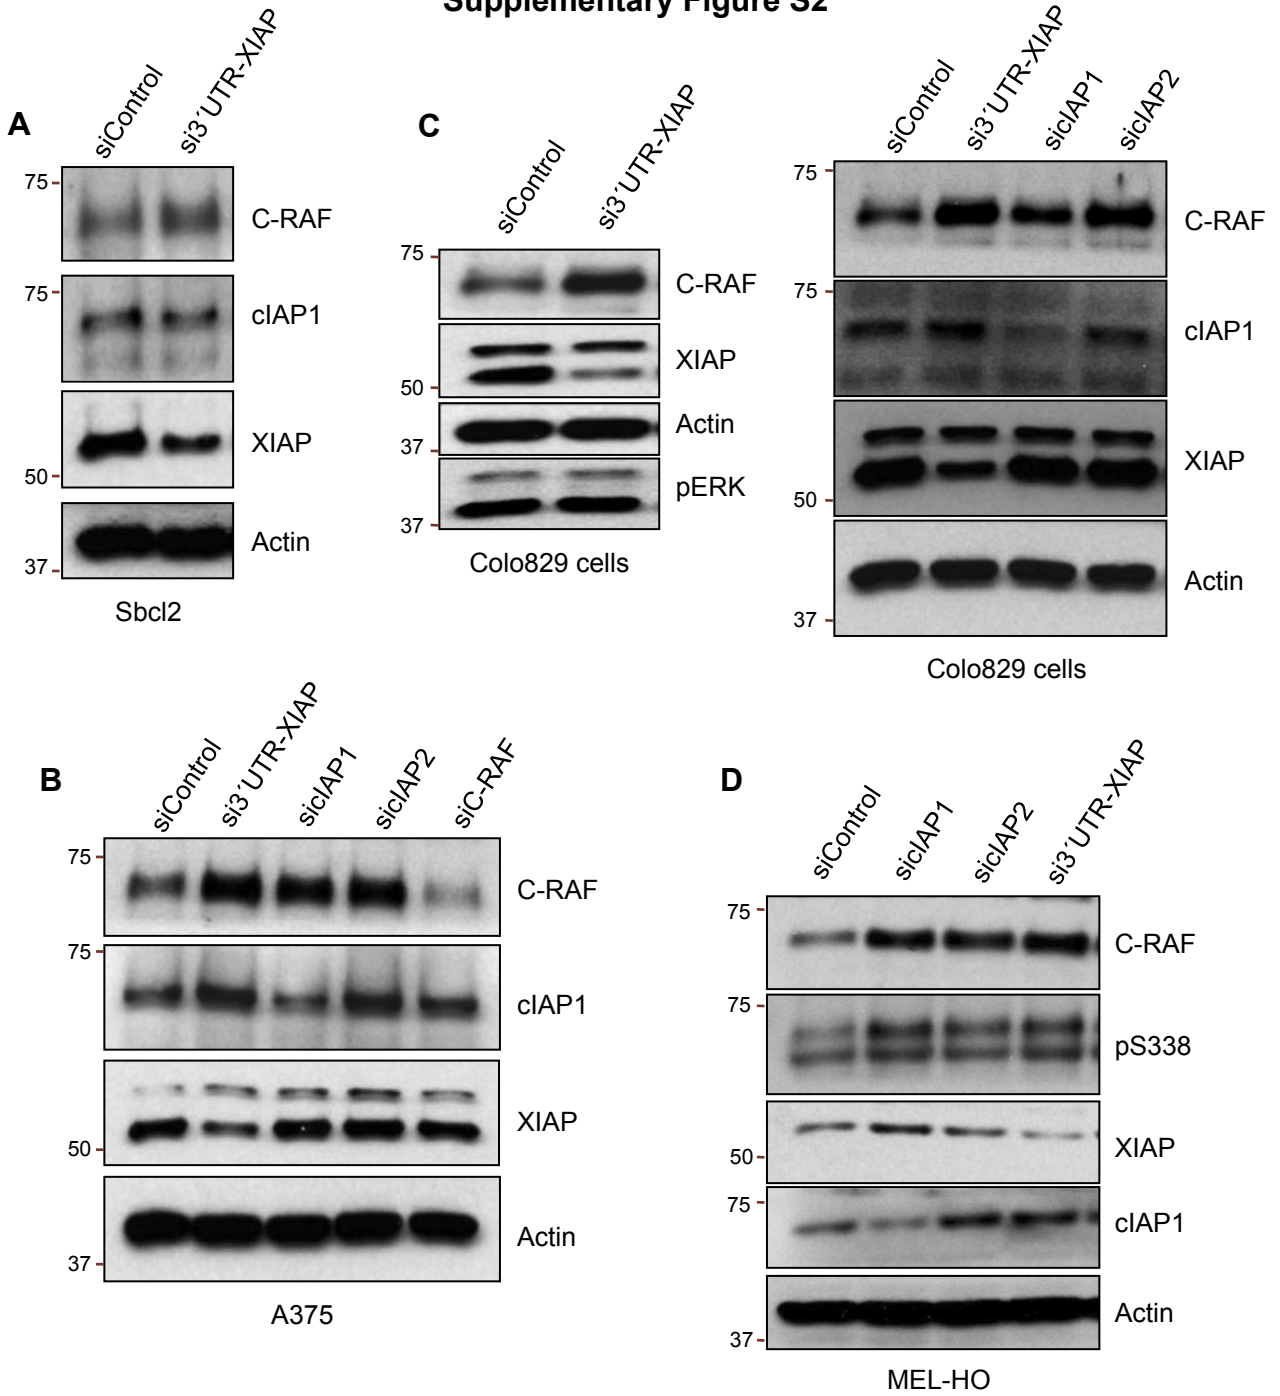

Supplementary Figure S3

**A**

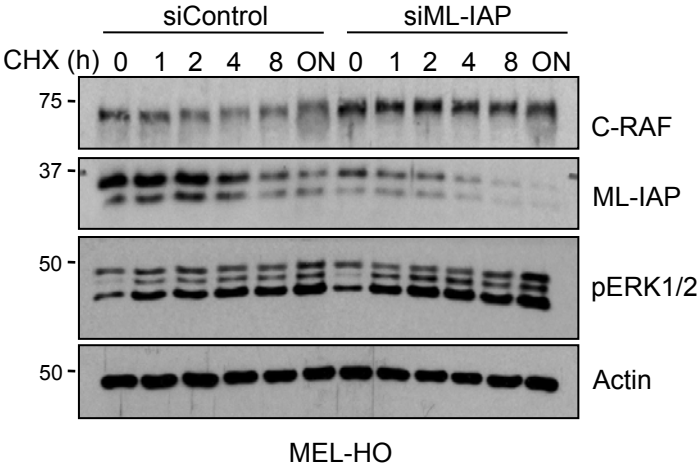

**B**

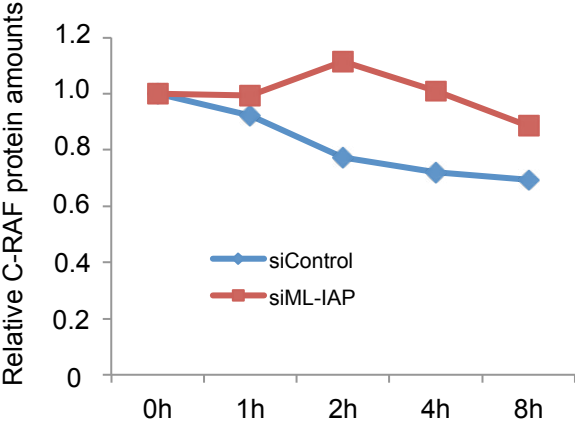

### Supplementary Figure S4

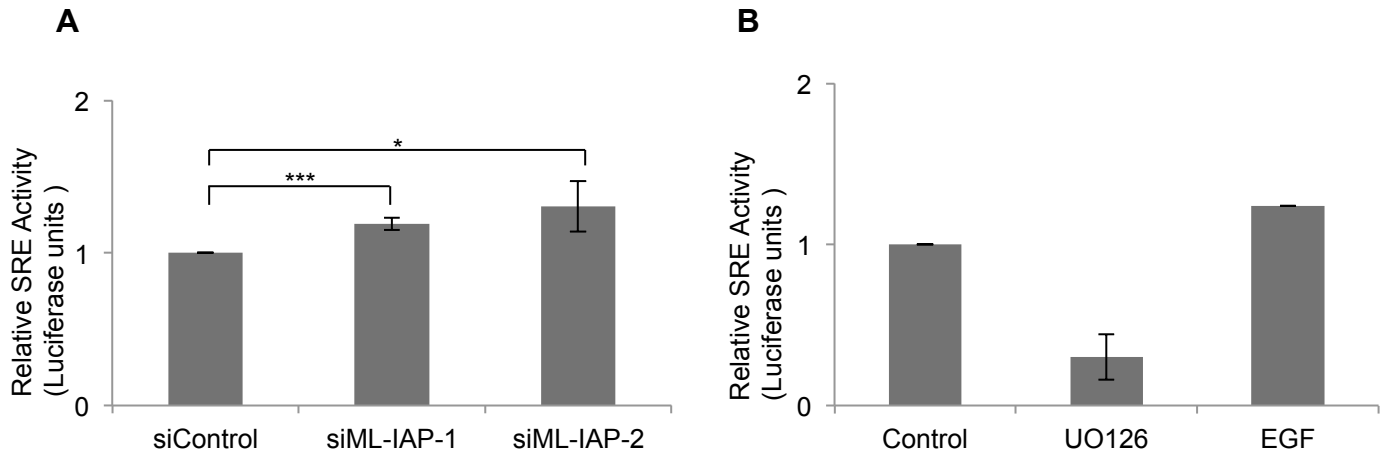

## Supplementary Figure legends

**Suppl. Figure S1: C-RAF binds specifically to Type II BIR domains of XIAP.** (A) Pictorial representation of GST-tagged XIAP WT and BIR domain mutants used for the GST-pulldown experiments with C-RAF. (B) GST-tagged XIAP WT and BIR domain mutants were used to pulldown His-C-RAF and then the results were checked by Western blotting.

**Suppl. Figure S2: Loss of IAPs leads to increase in C-RAF protein levels.** siRNA mediated knockdown of IAPs in Sbc12 (Ras mutant) (A), A375 (BRAF V600E) (B), Colo829 cells (BRAF V600E) (C), MEL-HO (myc) cells (D) lead to an increase in C-RAF levels, which was monitored by Western blot analysis. All siRNAs are validated in melanoma or other cell lines.

**Suppl. Figure S3: Loss of ML-IAP leads to C-RAF protein stability.** (A) Cycloheximide chase in MEL-HO cells with knockdown of ML-IAP shows an increase in the C-RAF protein levels at all timepoints as compared to control cells using western blotting. (B) Relative quantification of C-RAF protein levels in (A) by Image J software.

**Suppl. Figure S4: Loss of ML-IAP leads to MAPK activation.** (A) MEL-HO cells were stably transfected with SRE reporter construct having a downstream luciferase reporter. Knockdown of ML-IAP was performed using two different siRNAs and luciferase activity was monitored. Shown is the quantification from three different experiments. (B) Control for SRE luciferase assay as shown in (A). UO126 treatment used as a negative control decreases the luciferase activity and EGF stimulation as a positive control increases the SRE luciferase activity. Student t-test was performed to check for the significance (\* =  $P < 0.05$ , \*\* =  $P < 0.01$ , \*\*\* =  $P < 0.005$ ).
